# Supplementary material for: Sidewall functionalization of single-walled carbon nanotubes with organic peroxidesElectronic supplementary information (ESI) available: Fig. S1: Raman spectra of pristine and functionalized SWNTs. Fig. S2: UV-Vis-NIR spectra of pristine and functionalized SWNTs. See http://www.rsc.org/suppdata/cc/b2/b209456h/
Source: Royal Society of Chemistry journal article supplement (doi:10.1039/b209456h), 2003-01-07
Supplement: b209456h.pdf [file b209456h.pdf]

Electronic Supplementary Information

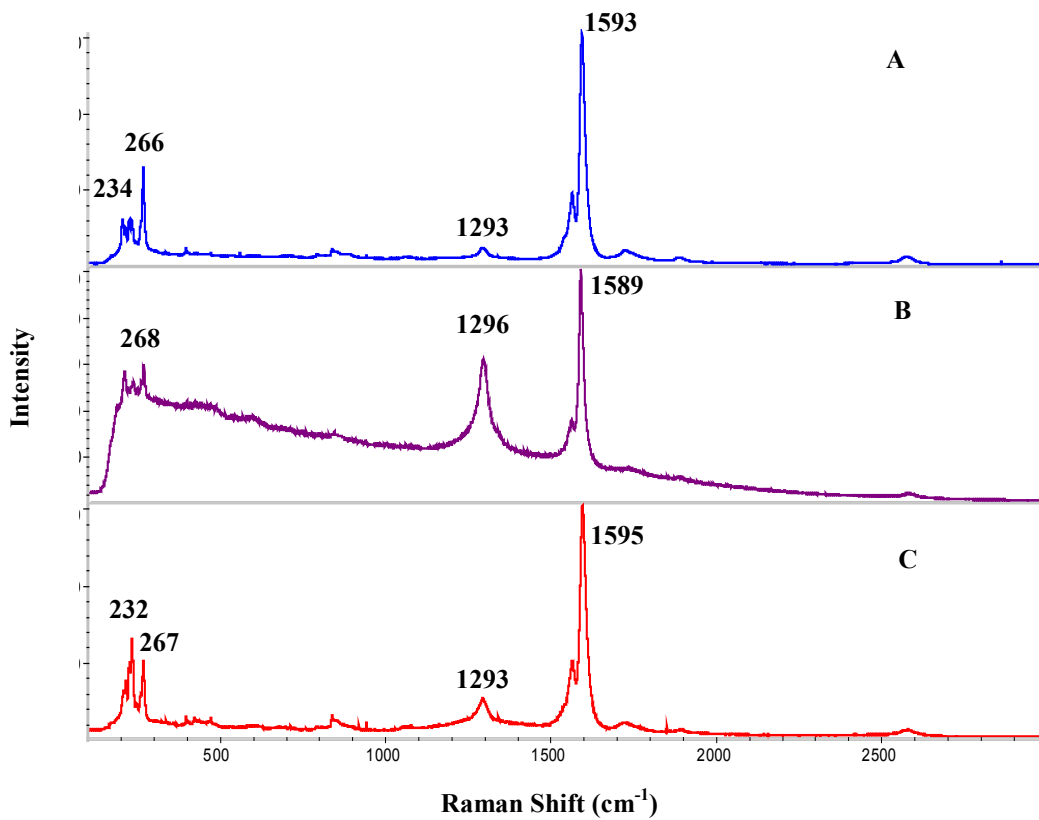

**Fig. S1:** Raman spectra of pristine and functionalized SWNTs. (A) purified pristine SWNTs, (B): phenylated SWNTs, **1a**, (C) residue from phenylated SWNTs after TGA.

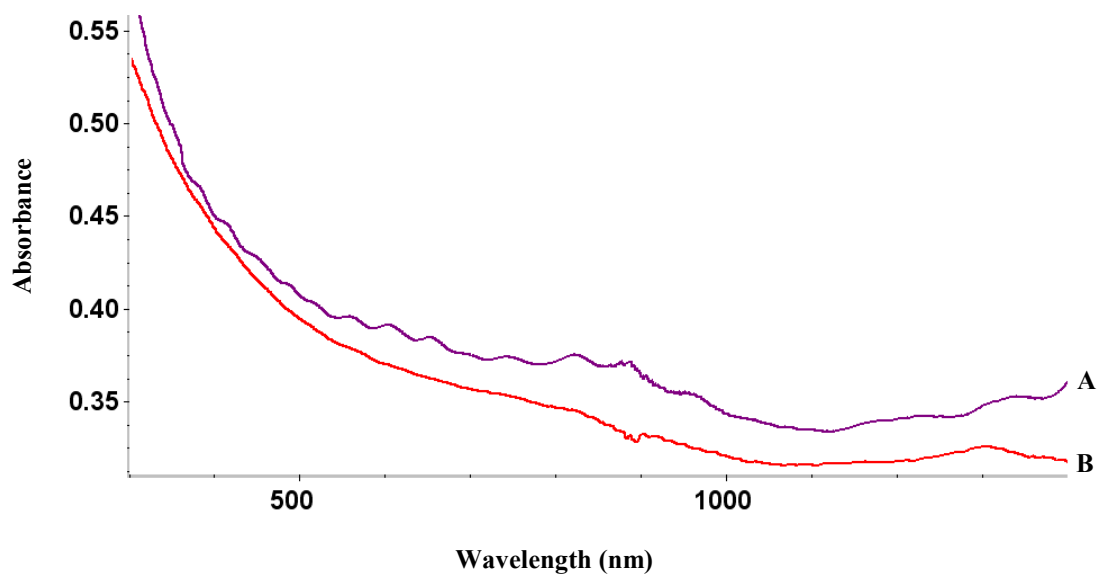

**Fig. S2:** UV-Vis-NIR spectra of pristine and functionalized SWNTs. (A) purified pristine SWNTs, (B) phenylated SWNTs, **1a**.
